# Supplementary material for: Modeling vegetation and carbon dynamics of managed grasslands at the global scale with LPJmL 3.6
Source: Copernicus journal article supplement (doi:10.5194/gmd-11-429-2018), 2018-02-01
Supplement: Supplementary file 1 [file gmd-11-429-2018-supplement.pdf]

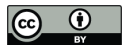

*Supplement of*

## **Modeling vegetation and carbon dynamics of managed grasslands at the global scale with LPJmL 3.6**

**Susanne Rolinski et al.**

*Correspondence to:* Susanne Rolinski ([susanne.rolinski@pik-potsdam.de](mailto:susanne.rolinski@pik-potsdam.de))

The copyright of individual parts of the supplement might differ from the CC BY 3.0 License.

## S1 Maps of default option *D*

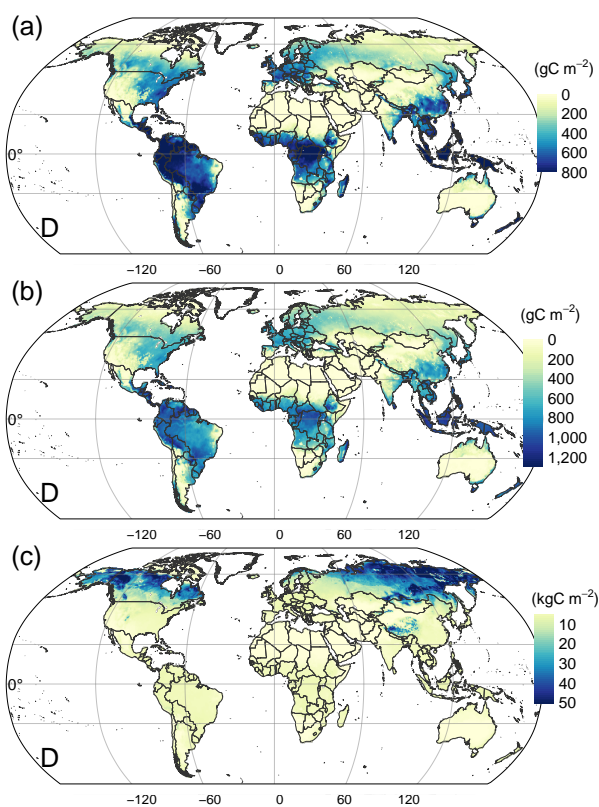

**Figure S1.** Simulation results for option *D* averaged over 1998 to 2002, a) grass harvest ( $\text{gC m}^{-2}$ ), b) NPP ( $\text{gC m}^{-2}$ ) and c) soil carbon ( $\text{kgC m}^{-2}$ ).

## S2 Maps of mowing option *M*

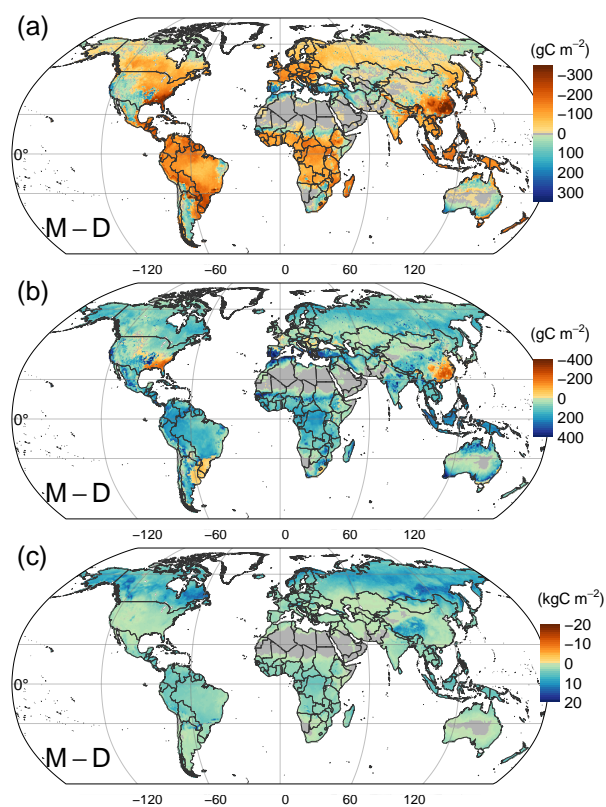

**Figure S2.** Simulation results for option *M* averaged over 1998 to 2002, a) grass harvest difference to option *D* ( $\text{gC m}^{-2} \text{a}^{-1}$ ), b) NPP difference to option *D* ( $\text{gC m}^{-2} \text{a}^{-1}$ ) and c) soil carbon difference to option *D* ( $\text{kgC m}^{-2}$ ).

### S3 Maps of daily grazing option $G_D$

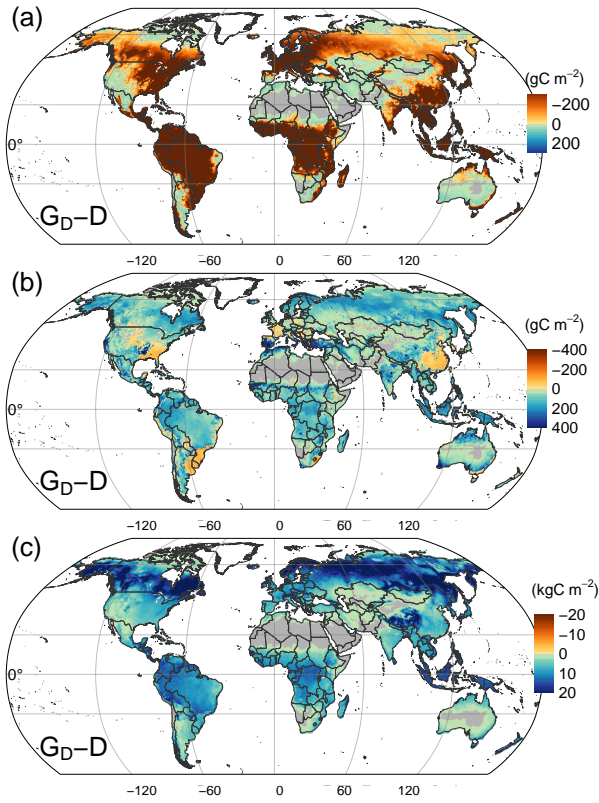

**Figure S3.** Simulation results for option  $G_D$  averaged over 1998 to 2002, a) grass harvest difference to option  $D$  ( $\text{gC m}^{-2} \text{a}^{-1}$ ), b) NPP difference to option  $D$  ( $\text{gC m}^{-2} \text{a}^{-1}$ ) and c) soil carbon difference to option  $D$  ( $\text{kgC m}^{-2}$ ).

### S4 Maps of rotational grazing option $G_R$

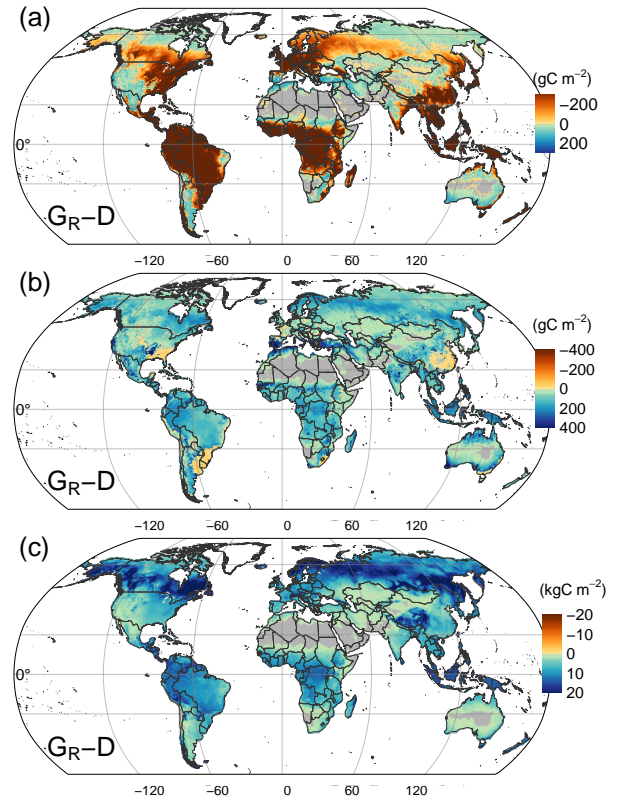

**Figure S4.** Simulation results for option  $G_R$  averaged over 1998 to 2002, a) grass harvest difference to option  $D$  ( $\text{gC m}^{-2} \text{a}^{-1}$ ), b) NPP difference to option  $D$  ( $\text{gC m}^{-2} \text{a}^{-1}$ ) and c) soil carbon difference to option  $D$  ( $\text{kgC m}^{-2}$ ).
